# Supplementary material for: Effects of anti-PD-1 immunotherapy on tumor regression: insights from a patient-derived xenograft model
Source: PubMed Central journal article supplement (PMC7184589; doi:10.1038/s41598-020-63796-w), 2020-04-27
Supplement: 41598_2020_63796_MOESM1_ESM.pdf [file 41598_2020_63796_MOESM1_ESM.pdf]

## **SUPPLEMENTARY MATERIAL**

### **Research Article**

#### **TITLE**

**Effects of anti-PD-1 immunotherapy on tumor regression: insights from a patient-derived xenograft model.**

#### **AUTHORS**

Asunción Martín-Ruiz<sup>1,2</sup>, Carmen Fiuza-Luces<sup>3</sup>, Esther Martínez-Martínez<sup>1,4</sup>, Clemente F. Arias<sup>5</sup>, Lourdes Gutiérrez<sup>1</sup>, Manuel Ramírez<sup>6</sup>, Paloma Martín-Acosta<sup>7</sup>, Maria José Coronado<sup>8</sup>, Alejandro Lucia<sup>2,3</sup> and Mariano Provencio<sup>1\*</sup>.

**\*Correspondence:** Dr. Mariano Provencio, [mprovenciop@gmail.com](mailto:mprovenciop@gmail.com)

## **SUPPLEMENTARY MATERIAL**

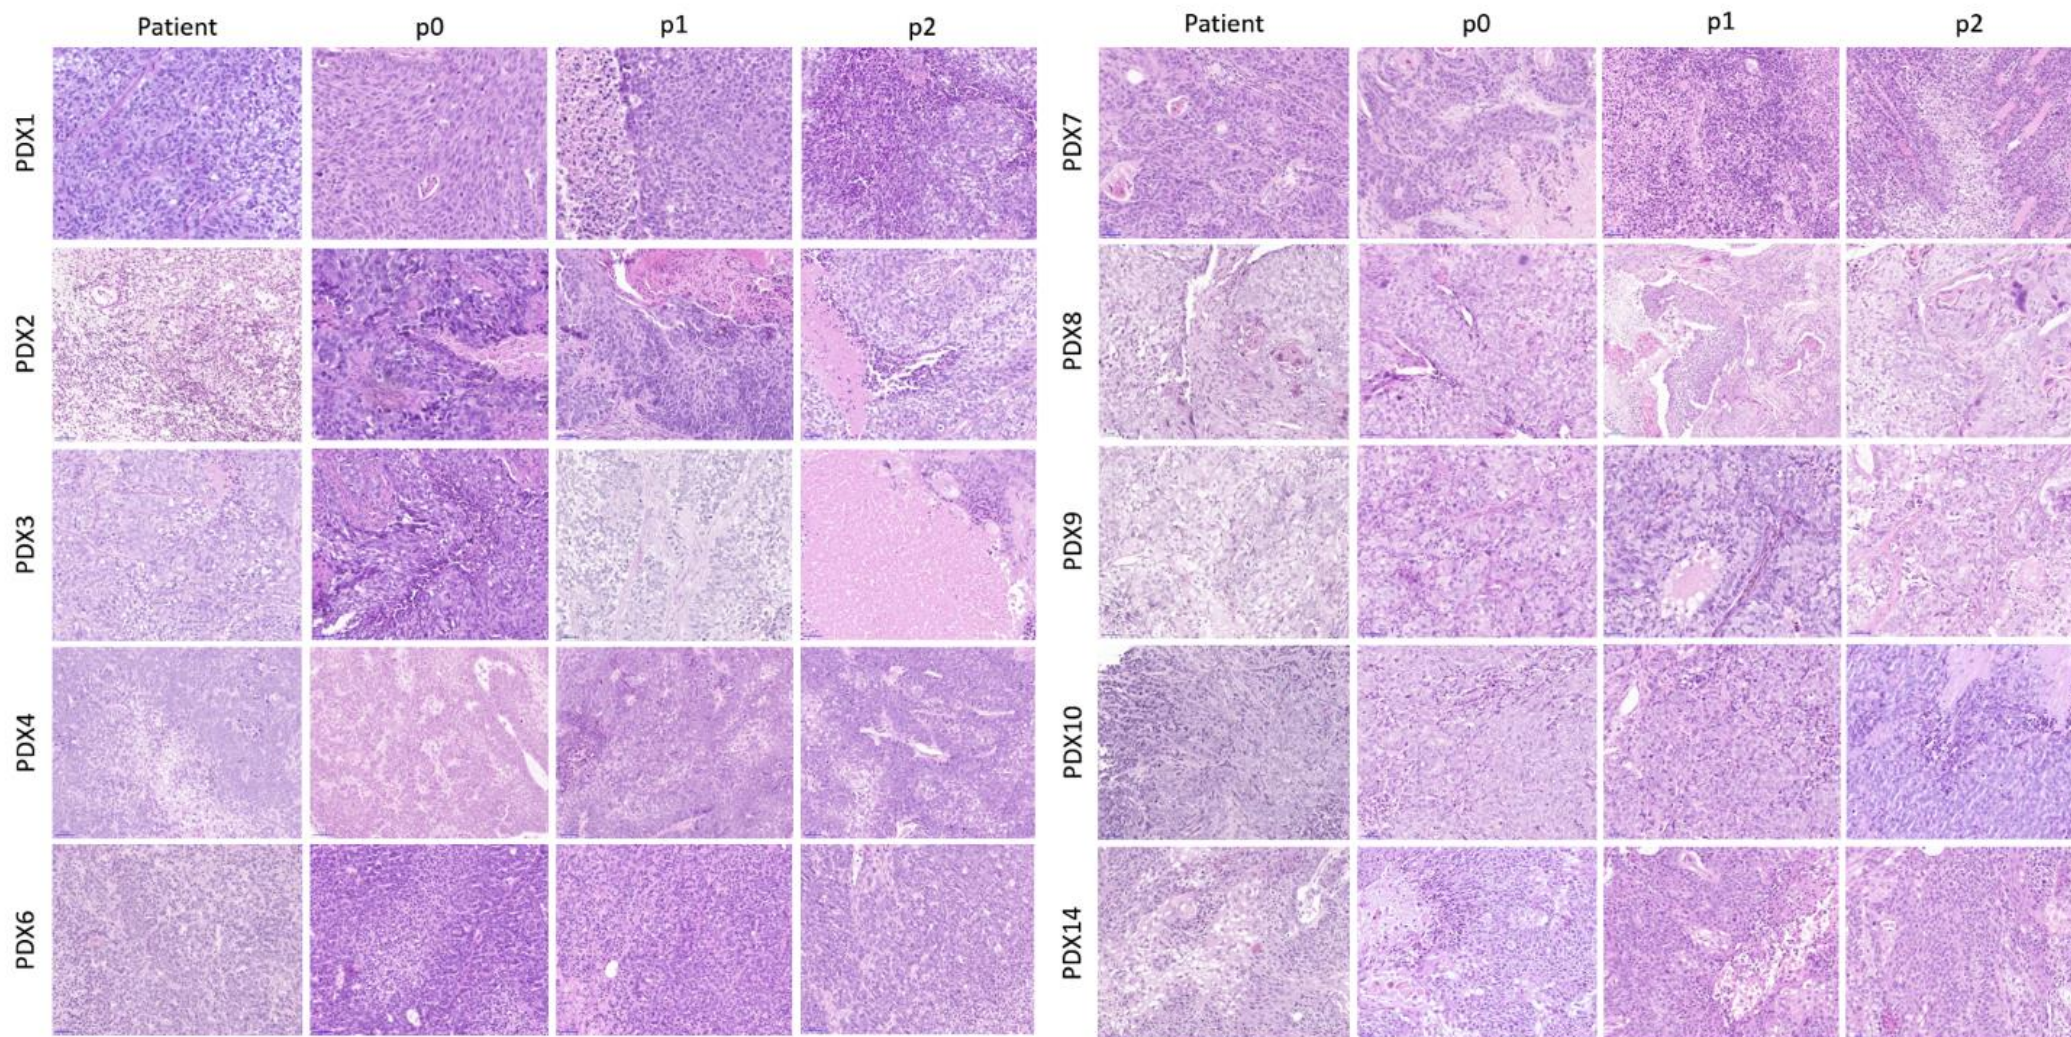

**Figure S1**

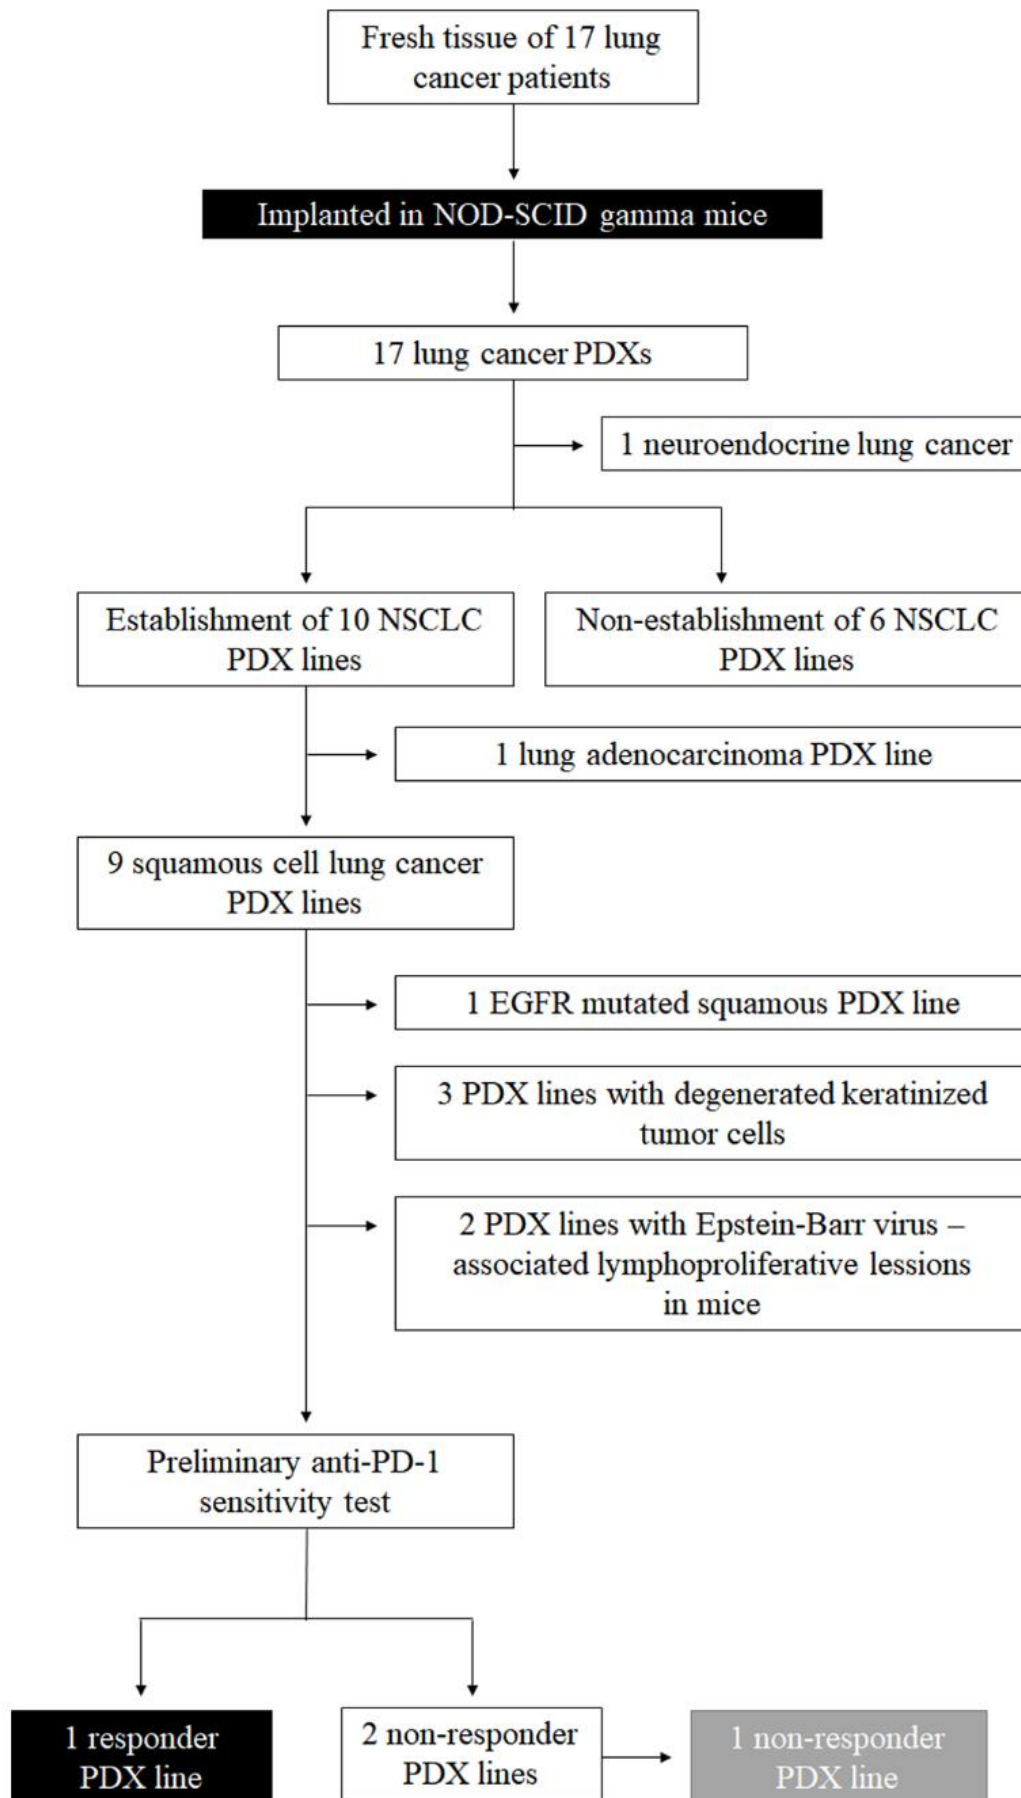

**Figure S2**

**A**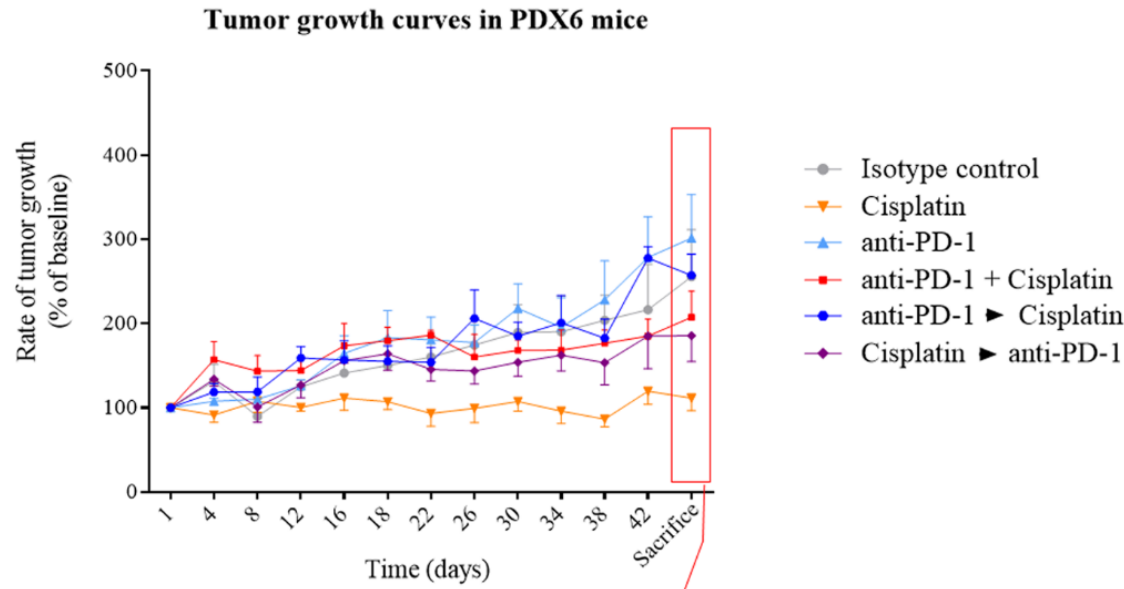**B**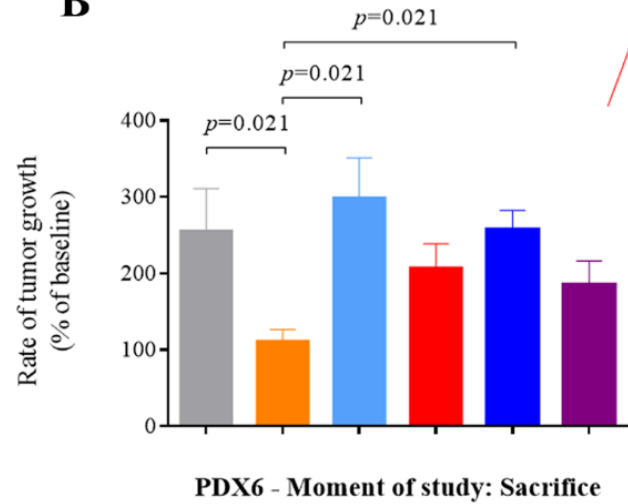**C**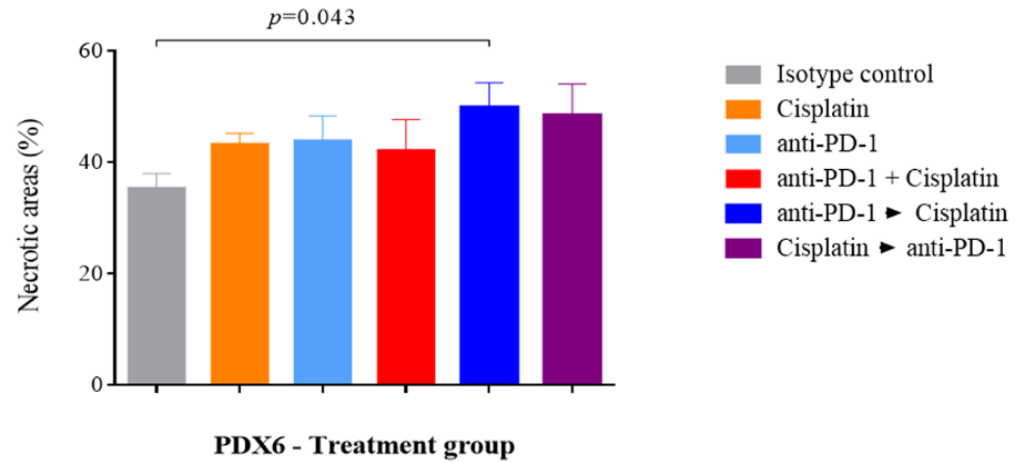**Figure S3**

**A**

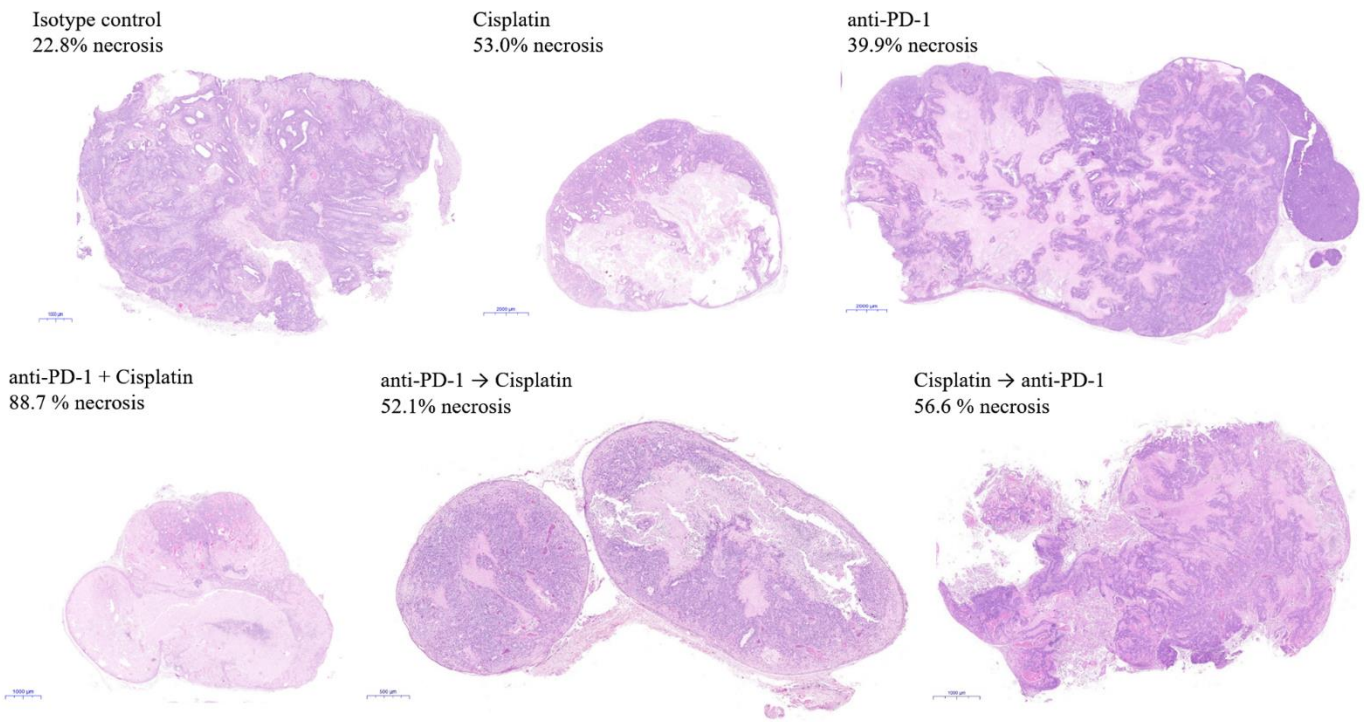

**B**

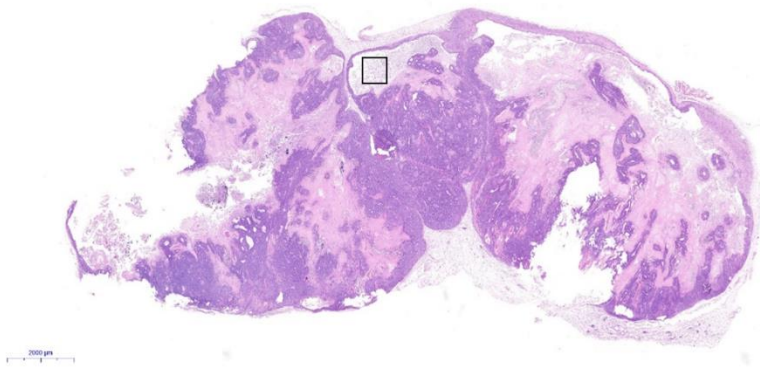

**C**

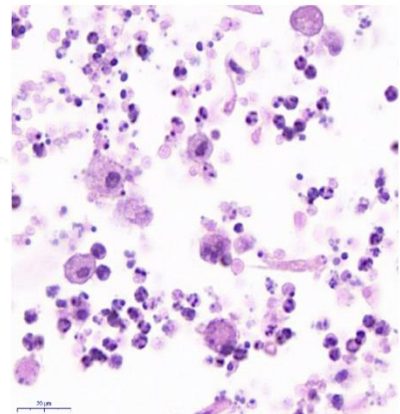

**D**

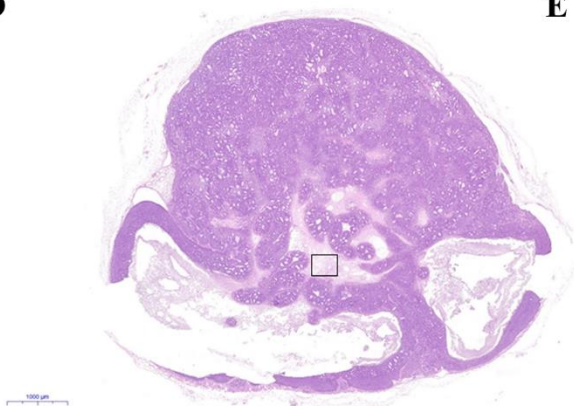

**E**

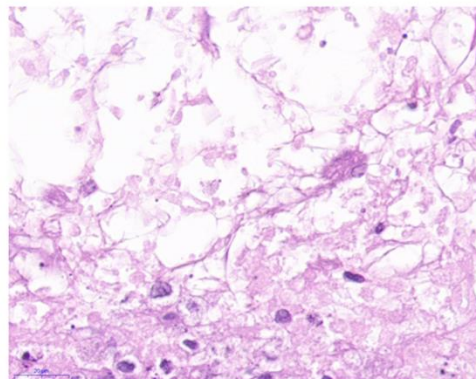

**Figure S4**

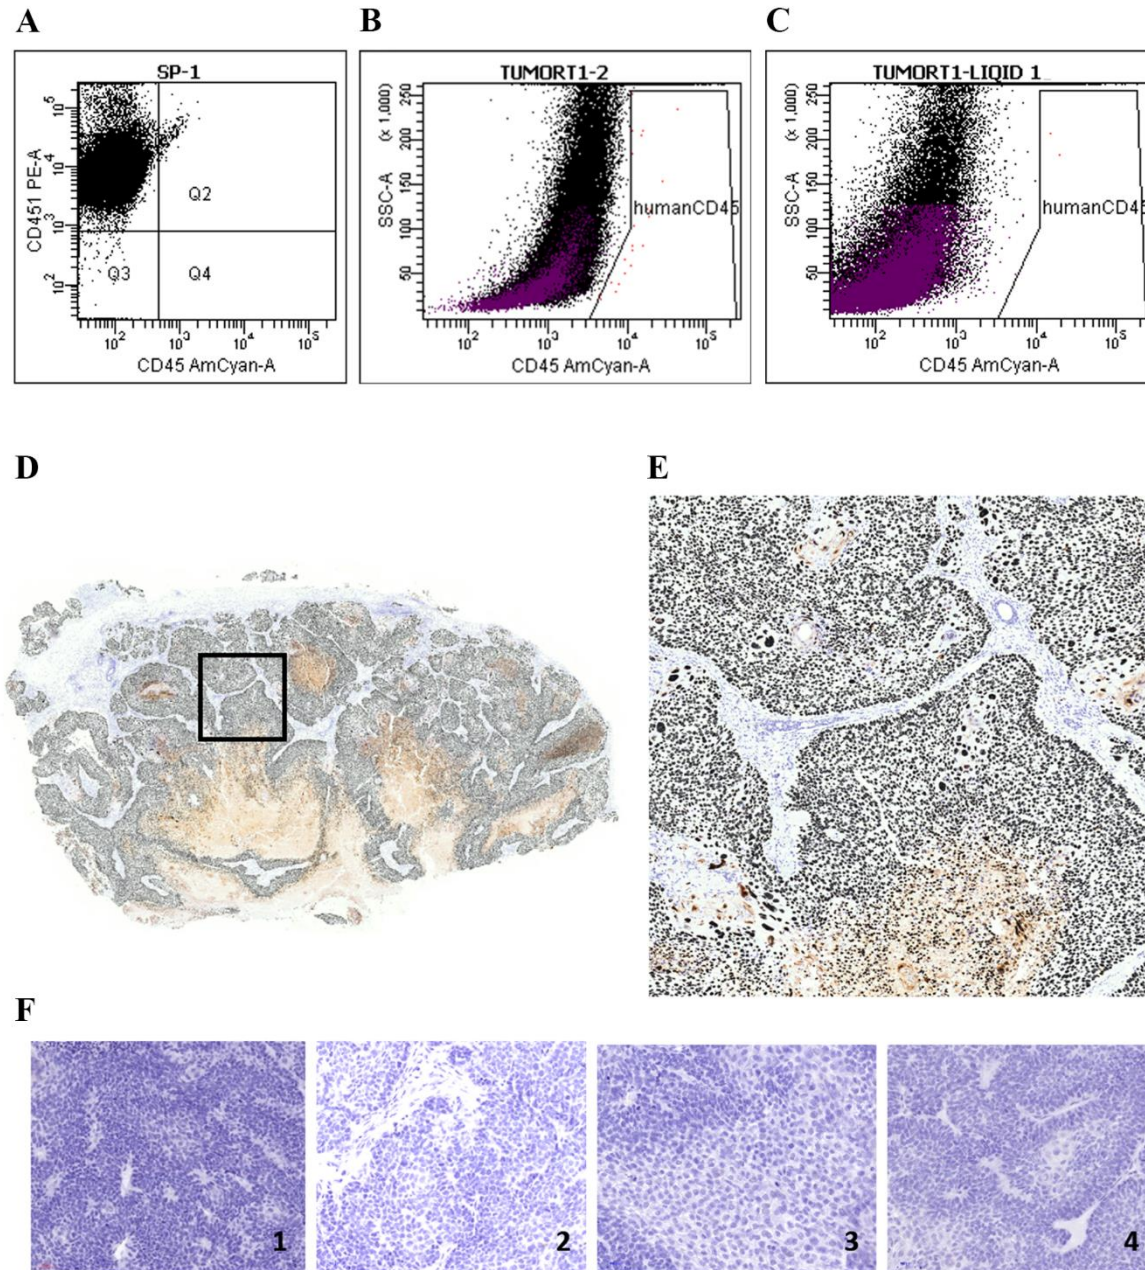

**Figure S5**

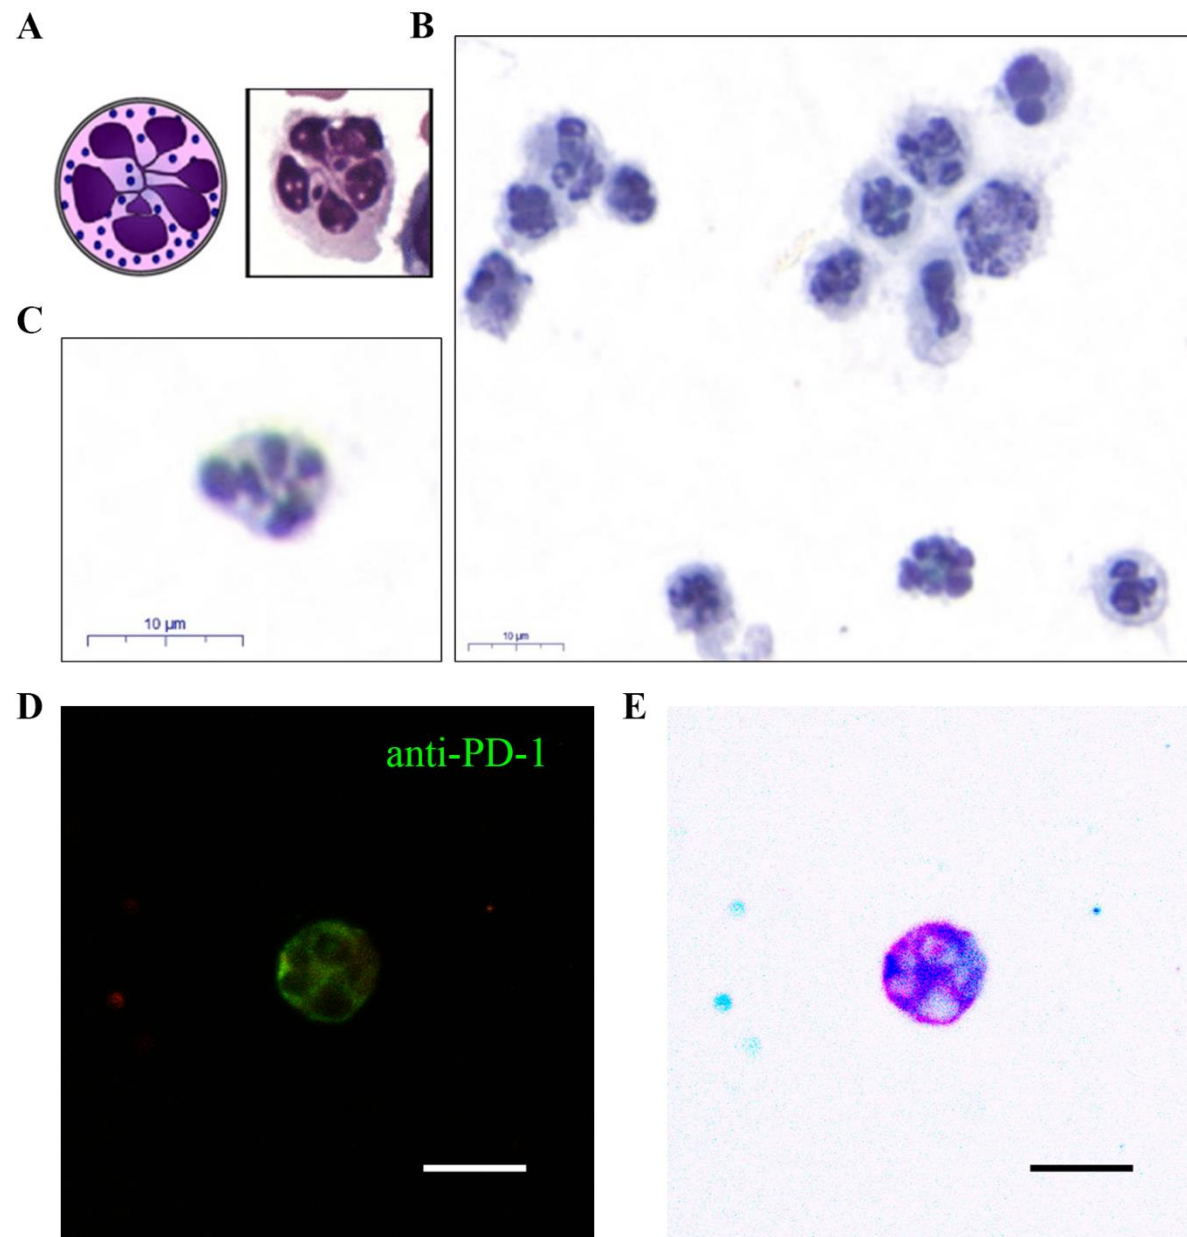

**Figure S6**



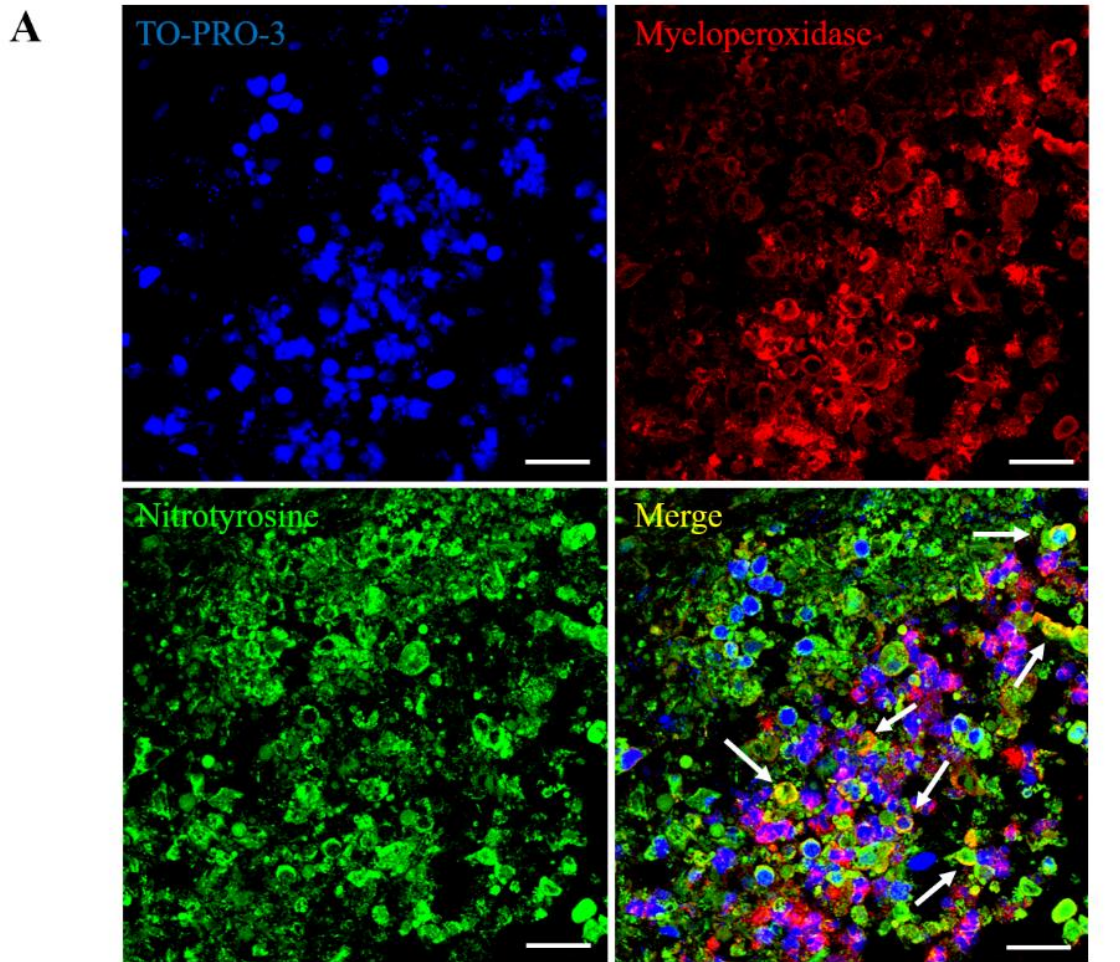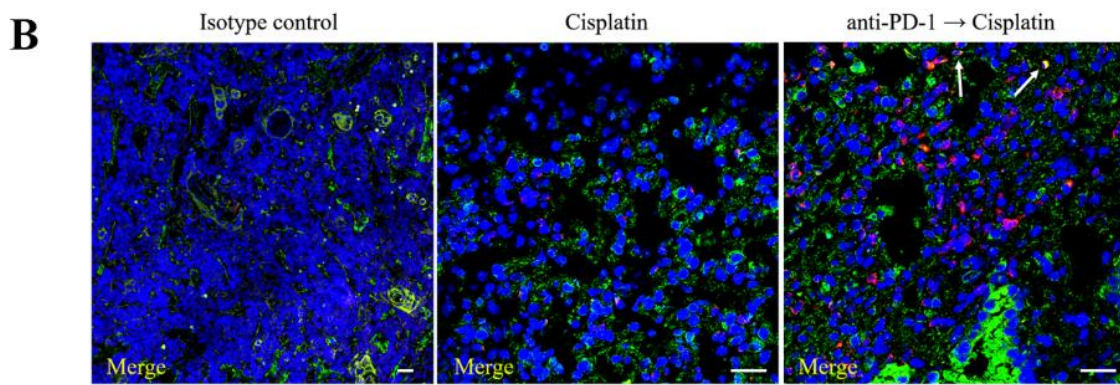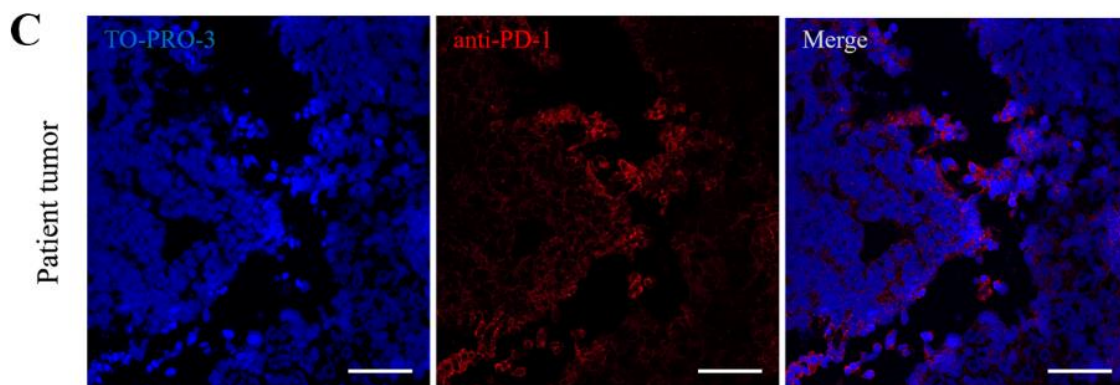

**Figure S7**

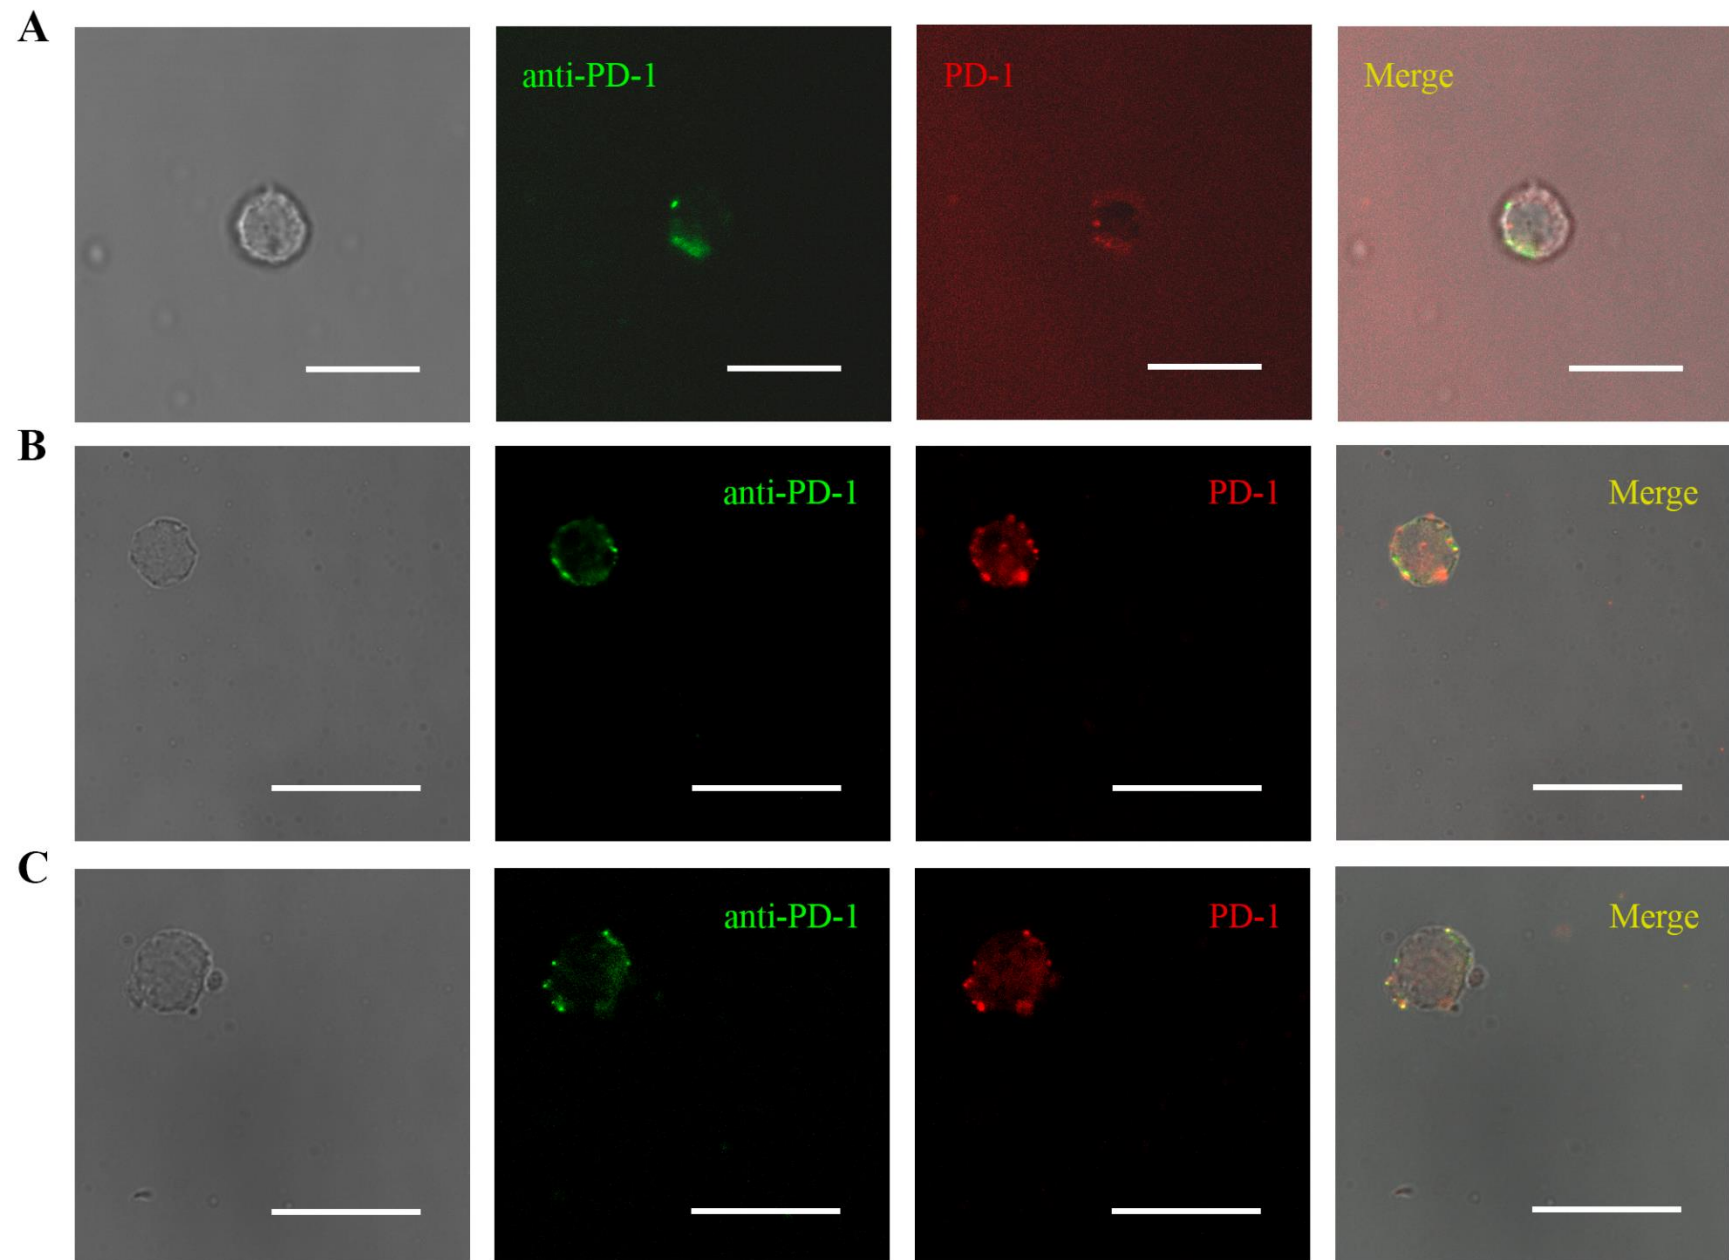

**Figure S8**

## Supplementary text file S1

### *Establishment of a human squamous NSCLC PDX model*

Female 8-week-old NOD-SCID gamma (NOD.Cg-Prkdc<sup>scid</sup> Il2rg<sup>tm1Wjl</sup>/SzJ) mice were purchased from Charles River Laboratories (Chatillon-sur-Chalaronne, France). Mice were transplanted with a direct surgically obtained tumor sample from patients with NSCLC using the following protocol. The specimen was sliced into fragments (~3 mm × 2 mm) and two pieces were implanted subcutaneously into the flanks (bilateral grafts) of each host mouse (passage 0 or p0) under inhalation anesthesia (sevoflurane in oxygen, Sevorane). After transplant, tumor growth was monitored and, whenever palpable, the volume was measured with a caliper (AA846R, Aesculap AG, Tuttlingen, Germany) twice weekly using the following formula:  $(4\pi/3) \times (w/2)^2 \times (l/2)$ , where w = width and l = length. When the tumor volume reached ~1 cm<sup>3</sup>, the mice were sacrificed by CO<sub>2</sub> inhalation. A portion of the harvested tumor was used for phenotype and molecular analyses to verify that the xenograft model was histopathologically stable, and another portion was harvested and serially re-engrafted to maintain the *in vivo* PDX line during subsequent passages (termed p1, p2, etc.). Several NSCLC PDX lines were established, and those lines fulfilling the following criteria were selected: squamous histology, not having driver mutations, and maintenance of the original tumor characteristics throughout the passages.

### *Preliminary test of response to anti-PD-1 therapy*

To evaluate the response of the PDX model to immunotherapy, a preliminary test was performed based on changes to tumor volume, which would allow for the detection of responders *versus* non-responders. Groups of three mice (p1) were administered with anti-PD-1 therapy (nivolumab [Opdivo®, Bristol-Myers Squibb, Princeton, NJ, USA is a fully human immunoglobulin G4 (hIgG4, Crown Bioscience, Inc. [Santa Clara, CA, USA]) PD-1 immune checkpoint inhibitor antibody that disrupts the interaction of PD-1 with its ligands PD-L1 and PD-L2, blocking the immune response], 150 µg) or an equivalent dose of an irrelevant hIgG4 by intra-peritoneal (i.p.) injection twice weekly for 3 consecutive weeks. Responder mice were selected and maintained through consecutive passages.

**Supplementary Table S1.** Primary antibodies used for different immunodetection techniques

| <b>Antibody</b>       | <b>Supplier</b>      | <b>Clone</b>  | <b>Type</b>   | <b>Species</b> | <b>Uses</b> | <b>System</b>   | <b>Dilution</b>     |
|-----------------------|----------------------|---------------|---------------|----------------|-------------|-----------------|---------------------|
| TTF-1                 | Dako                 | 8G7G3/1       | mAb, mouse    | Human          | IHC         | Omnis Dako      | 1:200               |
| CD56                  | Dako                 | 123C3         | mAb, mouse    | Human          | IHC         | Omnis Dako      | 1:50                |
| Synaptophysin         | Dako                 | DAK-SYNAP     | mAb, mouse    | Human          | IHC         | Omnis Dako      | <i>Ready-to-use</i> |
| Napsin-A              | Novocastra           | IP64          | mAb, mouse    | Human          | IHC         | Leica           | 1:500               |
| p40                   | Dako                 | BC28          | mAb, mouse    | Human          | IHC         | Ventana (Roche) | 1:500               |
| p63                   | Dako                 | DAK-p63       | mAb, mouse    | Human          | IHC         | Omnis Dako      | <i>Ready-to-use</i> |
| CK-5/6                | Dako                 | D5/16 B4      | mAb, mouse    | Human          | IHC         | Omnis Dako      | <i>Ready-to-use</i> |
| CD45                  | Dako                 | 2B11 + PD7/26 | mAb, mouse    | Human          | IHC         | Omnis Dako      | <i>Ready-to-use</i> |
| CD3                   | Dako                 | GA503         | pAb, rabbit   | Human          | IHC         | Omnis Dako      | <i>Ready-to-use</i> |
| CD4                   | Dako                 | 4B12          | mAb, mouse    | Human          | IHC         | Omnis Dako      | <i>Ready-to-use</i> |
| CD20cy                | Dako                 | L26           | mAb, mouse    | Human          | IHC         | Omnis Dako      | <i>Ready-to-use</i> |
| PD-1                  | Cell Marque          | NAT105        | mAb, mouse    | Human          | IHC         | Ventana (Roche) | 1:50                |
| PD-L1                 | BioLegend            | 29E.2A3       | mAb, mouse    | Human          | IHC         | Manual          | 1:200               |
| Nitrotyrosine         | Abcam                | HM.11         | mAb, mouse    | Human/mouse    | IF          | Manual          | 1:25                |
| Myeloperoxidase (MPO) | R&D Systems          | AF3174        | pAb, rabbit   | Human/mouse    | IF          | Manual          | 1:25                |
| Nivolumab (anti-PD-1) | Bristol-Myers Squibb | -             | humanized mAb | Human/mouse?   | IF          | Manual          | 1:200               |

Immunohistochemistry (IHC), immunofluorescence (IF), monoclonal antibody (mAb), polyclonal antibody (pAb). Markers of NSCLC immunophenotype panel shaded in light gray; other immunohistochemistry markers are shaded in dark gray and immunofluorescence markers are non-shaded



**Supplementary Table S2.** List of antibodies used for flow cytometry analysis

| <b>Protein</b> | <b>Clone</b> | <b>Brand</b>                |
|----------------|--------------|-----------------------------|
| hCD33          | HIM3-4       | Becton Dickinson–PharMingen |
| hCD4           | SK3          | Becton Dickinson–PharMingen |
| hCD56          | NCAM16,2     | Becton Dickinson–PharMingen |
| hCD19          | HIB19        | Becton Dickinson–PharMingen |
| hCD8           | SK1          | BioLegend                   |
| hCD3           | UCHT1        | Becton Dickinson–Horizon    |
| hCD45          | 2D1          | Becton Dickinson–PharMingen |
| 7-AAD          | –            | BioLegend                   |
| mCD45.1        | A20          | BioLegend                   |
| mLy6G          | 1A8          | BioLegend                   |
| mNK1.1         | PK136        | BioLegend                   |
| mCD11B         | M1/70        | BioLegend                   |
| mCD3           | 145-2C11     | BioLegend                   |
| mCD45          | 30-F11       | BioLegend                   |

**Supplementary Table S3.** Antibodies per tube and per tumor homogenate sample used for flow cytometry analysis based on fluorophore labeling.

|                                 | <b>FITC</b> | <b>PE</b> | <b>PerCP</b> | <b>PE-Cy7</b> | <b>APC</b> | <b>APC-Cy7</b> | <b>PB</b> | <b>AC</b> |
|---------------------------------|-------------|-----------|--------------|---------------|------------|----------------|-----------|-----------|
| <b>Peripheral blood tube</b>    | hCD33       | mCD45.1   | hCD4         | hCD56         | hCD19      | hCD8           | hCD3      | hCD45     |
| <b>Tumor tube 1</b>             | hCD4        | mCD45.1   | 7-AAD        | hCD56         | hCD19      | hCD8           | hCD3      | hCD45     |
| <b>Tumor tube 2</b>             |             | mLy6G     | 7-AAD        | mNK1.1        | mCD11b     | mCD3           |           | mCD45     |
| <b>Isolated neutrophil tube</b> | mCD206      | mCD11c    | 7-AAD        | mF4/80        | mCD11b     | mLy6G          | mLy6C     | mCD45     |

Abbreviations: FITC (Fluorescein isothiocyanate); PE (Phycoerythrin); PerCP-CY7 (Peridinin chlorophyll protein); PE-Cy7 (Phycoerythrin cyanin 7); APC (Allophycocyanin); APC-Cy7 (Allophycocyanin-cyanin 7); PB (Pacific blue); AC (AmCyan).

**Supplementary Table S4.** Antibody conditions for immunofluorescence staining.

|                                                                                 | Primary antibody |          |                        | Secondary antibody       |          |                         |
|---------------------------------------------------------------------------------|------------------|----------|------------------------|--------------------------|----------|-------------------------|
|                                                                                 |                  | Dilution | Supplier               |                          | Dilution | Supplier                |
| <b>Myeloperoxidase</b>                                                          | anti-MPO         | 1:25     | R&D Systems            | anti-goat IgG Alexa 546  | 1:500    | Invitrogen              |
| <b>Nitrotyrosine</b>                                                            | anti-Nitrotyr    | 1:25     | Abcam                  | anti-mouse IgG Alexa 488 | 1:500    | Invitrogen              |
| <b>PD-1</b>                                                                     | anti-PD-1        | 1:200    | Bristol-Myers Squibb   | anti-human IgG Alexa 546 | 1:500    | Invitrogen              |
| <b>Double immunofluorescence:<br/>Myeloperoxidase/Nitrotyrosine</b>             | anti-MPO         | 1:25     | R&D Systems            | anti-goat IgG Alexa 546  | 1:500    | Invitrogen              |
|                                                                                 | anti-Nitrotyr    | 1:25     | Abcam                  | anti-mouse IgG Alexa 488 | 1:500    | Invitrogen              |
| <b>Double immunofluorescence:<br/>Myeloperoxidase/PD-1</b>                      | anti-MPO         | 1:25     | R&D Systems            | anti-goat IgG Alexa 488  | 1:500    | Invitrogen              |
|                                                                                 | anti-PD-1        | 1:200    | Bristol-Myers Squibb   | anti-human IgG Alexa 546 | 1:500    | Invitrogen              |
| <b>Double immunofluorescence of isolated<br/>neutrophils: PD-1/FcγR</b>         | anti-PD-1        | 1:20     | Bristol-Myers Squibb   | anti-human IgG–FITC      | 1:200    | A. Menarini Diagnostics |
|                                                                                 | PD-1–PE          | 1/500    | Abcam                  |                          |          |                         |
| <b>Control double immunofluorescence of<br/>isolated neutrophils: PD-1/FcγR</b> | hIgG4            | 1:20     | Crown Bioscience, Inc. | anti-human IgG–FITC      | 1:200    | A. Menarini Diagnostics |
|                                                                                 | PD-1–PE          | 1/500    | Abcam                  |                          |          |                         |



**Supplementary Table S5.** Clinical and pathologic characteristic of patients and passagable lung cancer

| ID/No.      | Gender   | Smoking status | Age       | Pathology  | Localization   | Grade / differentiation | Type                           | Mutation  | Tumor-stage                   | Established Xenograft |
|-------------|----------|----------------|-----------|------------|----------------|-------------------------|--------------------------------|-----------|-------------------------------|-----------------------|
| PDX1        | M        | YES            | 78        | SQC        | RUL            | Moderately              | Infiltrating                   | NO        | pT2a N0 L0 V0 R0 (IB)         | YES                   |
| PDX2        | M        | YES            | 66        | SQC        | RUL            | Poorly                  | Infiltrating / keratinized     | NO        | pT2a N0 L1 V1 R0 (IB)         | YES                   |
| PDX3        | M        | YES            | 73        | SQC        | RUL            | Poorly                  | Non-infiltrating               | NO        | pT2b N0 (IB)                  | YES                   |
| <b>PDX4</b> | <b>M</b> | <b>YES</b>     | <b>79</b> | <b>SQC</b> | <b>ML, RLL</b> | <b>Poorly</b>           | <b>Infiltrating / basaloid</b> | <b>NO</b> | <b>pT2a N1 L1 V0 R0 (IIA)</b> | <b>YES</b>            |
| PDX5        | M        | YES            | 68        | SQC        | LLL            | Moderately              | Infiltrating                   | NO        | pT4 N1 M0 (IIIA)              | NO                    |
| PDX6        | M        | NO             | 62        | SQC        | LUL            | Poorly                  | Infiltrating / basaloid        | NO        | pT1b N0 L0 V0 R0 (IA)         | YES                   |
| PDX7        | M        | YES            | 71        | SQC        | RUL            | Moderately              | Infiltrating / keratinized     | NO        | pT3 N1 R0 (IIIA)              | YES                   |
| PDX8        | M        | YES            | 74        | SQC        | RUL            | Poorly                  | Infiltrating / keratinized     | NO        | pT2b N1 P0 V0 R0 (IIB)        | YES                   |
| PDX9        | M        | YES            | 55        | ADC        | ML             | Poorly                  | Infiltrating                   | NO        | pT2a N0 P3 V2 R0 (IB)         | YES                   |
| PDX10       | M        | YES            | 64        | SQC        | LUL            | ns                      | Basaloid                       | NO        | pT1b N0 M0 (IA)               | YES                   |
| PDX11       | F        | YES            | 64        | ADC        | RUL            | ns                      | Infiltrating                   | NO        | pT2 N0 L1 V1 R0 (IB)          | NO                    |
| PDX12       | F        | NO             | 80        | ADC        | RLL            | ns                      | Infiltrating                   | Exon19Del | pT2a N0 M0 (IB)               | NO                    |
| PDX13       | M        | YES            | 65        | ADC        | RUL            | ns                      | Infiltrating                   | ALK/EML4  | pT2 N2 M0 (IIIA)              | NO                    |
| PDX14       | M        | YES            | 63        | SQC        | LUL            | Poorly                  | Infiltrating / keratinized     | G719X     | pT3 N1 L1 V1 R0 (IIIA)        | YES                   |
| PDX15       | M        | YES            | 36        | ADC        | LUL            | ns                      | Infiltrating                   | NO        | pT2a N0 (IB)                  | NO                    |
| PDX16       | F        | NO             | 60        | NEC        | LLL            | Poorly                  | ns                             | NO        | pT2a N0 L1 V0 R0 (IB)         | YES                   |
| PDX17       | M        | NO             | 74        | ADC        | RLL            | ns                      | Infiltrating                   | NO        | pT2a N0 M0 L1 (IB)            | NO                    |

Abbreviations: M, male; F, female; SQC, squamous carcinoma; ADC, adenocarcinoma; NEC, neuroendocrine carcinoma; RUL, right upper lobe; LUL, left upper lobe; ML, middle lobe; RLL, right lower lobe; LLL, left lower lobe; ns, not specified.
